# Supplementary material for: The Role of CzcRS Two-Component Systems in the Heavy Metal Resistance of Pseudomonas putida X4
Source: PubMed Central journal article supplement (PMC4581181; doi:10.3390/ijms160817005), 2015-07-27
Supplement: ijms-16-17005-s001.pdf [file ijms-16-17005-s001.pdf]

## Supplementary Information

**Table S1.** The sequence similarity between different *czcR* and *czcS* genes.

| Genes        | Sequence Similarity |              |              |              |              |
|--------------|---------------------|--------------|--------------|--------------|--------------|
|              | <i>czcR1</i>        | <i>czcR2</i> | <i>czcR3</i> | <i>czcS1</i> | <i>czcS2</i> |
| <i>czcR1</i> | 100%                | –            | –            | –            | –            |
| <i>czcR2</i> | 69%                 | 100%         | –            | –            | –            |
| <i>czcR3</i> | 67%                 | 73%          | 100%         | –            | –            |
| <i>czcS1</i> | –                   | –            | –            | 100%         | –            |
| <i>czcS2</i> | –                   | –            | –            | 47%          | 100%         |
